# Supplementary material for: Carbon quantum dots (CQDs)-modified polymers: a review of non-optical applications
Source: Royal Society of Chemistry journal article supplement (doi:10.1039/d3nr04997c), 2023-12-21
Supplement: d3nr04997c1.pdf [file d3nr04997c1.pdf]

## Supporting Information

### **Carbon quantum dots (CQDs) modified polymers: a mini review of non-optical applications**

Zeeshan Latif<sup>a#</sup>, Kinza Shahid<sup>b#</sup>, Hassan Anwer<sup>c</sup>, Raghisa Shahid<sup>b</sup>, Mumtaz Ali<sup>a\*</sup>, Kang Hoon Lee<sup>d\*</sup>, Mubark Alshareef<sup>e</sup>

<sup>a</sup>School of Engineering and Technology, National Textile University, Sheikhpura Road, 37610 Faisalabad, Pakistan

<sup>b</sup>Department of Applied Sciences, National Textile University, Sheikhpura Road, 37610 Faisalabad, Pakistan

<sup>c</sup>Department of Environmental Engineering, National University of Sciences and Technology, H-12 Islamabad, 44000, Pakistan

<sup>d</sup>Department of Energy and Environmental Engineering, The Catholic University of Korea, 43 Jibong-ro, Bucheon-si 14662, South Korea

<sup>e</sup>Department of Chemistry, Faculty of Applied Science, Umm Al Qura University, Makkah 24230, Saudi Arabia

# Joint First Authors (Zeeshan Latif and Kinza Shahid)

Corresponding authors email: M.A. ([mumtaz.ali@ntu.edu.pk](mailto:mumtaz.ali@ntu.edu.pk)) and K.H.L. ([diasyong@catholic.ac.kr](mailto:diasyong@catholic.ac.kr))

Table S1. Summary of recent works related to CQDs modified polymers.

| Sr. #                 | Precursors                           | Method       | Temp.      | Time       | Polymer Matrix             | Dispersion Technique                | Optimum conc. | Ref. |
|-----------------------|--------------------------------------|--------------|------------|------------|----------------------------|-------------------------------------|---------------|------|
| <b>Smart Polymers</b> |                                      |              |            |            |                            |                                     |               |      |
| 1                     | Cellulose fibers, ammonia            | Hydrothermal | 200 °C     | 4 h        | PVA                        | Blending                            | 1 wt. %       | [1]  |
| 2                     | Phenylboronic acid, NaOH, water      | Hydrothermal | 220 °C     | 12 h       | PVA                        | Mixing                              | 1 wt. %       | [2]  |
| 3                     | Yeast powder, water                  | Hydrothermal | 200 °C     | 8 h        | PVA                        | Mixing                              | 2 vol%        | [3]  |
| 4                     | Sodium citrate, EDA, water           | Hydrothermal | 160 °C     | 8 h        | PVA, agarose, CS, glycerin | Mixing                              | 3 vol%        | [4]  |
| 5                     | Poly(L-lysine)                       | Hydrothermal | 240 °C     | 3 h        | Oxidized dextran (ODA)     | Mixing                              | 15 w/v%       | [5]  |
| 6                     | Glutaraldehyde, ethanol              | Hydrothermal | 150 °C     | 2 h        | PEI                        | Schiff base reaction                | 2 wt%         | [6]  |
| 7                     | CA, urea, water                      | Microwave    | 700 W      | 10 min     | Agar and pAM               | Heating-cooling photopolymerization | 1 wt. %       | [7]  |
| 8                     | Cotton fibers, urea, water           | Hydrothermal | 200 °C     | 15 h       | PVDF-HFP                   | Mixing                              | 0.13 wt. %    | [8]  |
| 9                     | Purchase from Nanjing, China         | Commercially | Commercial | Commercial | PDLA and PLLA              | Mixing                              | 1 wt. %       | [9]  |
| 10                    | Purchase from Nanjing, China         | Commercially | Commercial | Commercial | PVDF                       | Mixing                              | 1 wt. %       | [10] |
| 11                    | Lignocellulose, magnesium hydroxide, | Hydrothermal | 225 °C     | 10 h       | PVA                        | Mixing                              | 1 wt. %       | [11] |

|                                      |                                                               |                              |                |                    |                         |                                   |             |      |
|--------------------------------------|---------------------------------------------------------------|------------------------------|----------------|--------------------|-------------------------|-----------------------------------|-------------|------|
|                                      | EDA,<br>water                                                 |                              |                |                    |                         |                                   |             |      |
| <b>Mechanically enhanced polymer</b> |                                                               |                              |                |                    |                         |                                   |             |      |
| 12                                   | Banana,<br>water,<br>ethanol                                  | Microwav<br>e                | 150 °C         | 4 h                | Epoxy<br>resin          | Mixing                            | 0.5<br>wt.% | [12] |
| 13                                   | Banana,<br>water,<br>ethanol                                  | Microwav<br>e                | 150 °C         | 4 h                | Epoxy<br>resin          | Mixing                            | 1.5<br>wt.% | [13] |
| 14                                   | Paddy<br>straw, HCL                                           | Hydrother<br>mal             | 160 °C         | 6 h                | Epoxy<br>resin          | Mixing                            | 0.1<br>vol% | [14] |
| 15                                   | CA, 2-<br>aminothiop<br>henol,<br>water                       | Hydrother<br>mal             | 170 °C         | 3 h                | TPU                     | In-situ<br>polymerizati<br>on     | 1 wt.%      | [15] |
| 16                                   | Banana<br>juice,<br>ethanol                                   | Heating<br>plup<br>method    | 150 °C         | 4 h                | WTPU                    | In-situ<br>polymerizati<br>on     | 1 wt.%      | [16] |
| 17                                   | Coal,<br>H <sub>2</sub> SO <sub>4</sub> ,<br>HNO <sub>3</sub> | Chemical<br>oxidation        | 120 °C         | 24 h               | PAN                     | Mixing                            | 1 wt%       | [17] |
| 18                                   | CA, urea,<br>phytic acid,<br>water                            | Hydrother<br>mal             | 180 °C         | 8 h                | CS                      | Mixing                            | 2 wt.%      | [18] |
| 19                                   | CA, urea                                                      | Heated<br>method             | 200 °C         | 25<br>min          | CR                      | Two roll<br>mill mixing           | 6 wt.%      | [19] |
| 20                                   | Diammoni<br>um citrate,<br>glycine                            | Pyrolysis<br>method          | 120 °C         | 10-15<br>min       | XSBR                    | Mixing                            | 0.8 phr     | [20] |
| 21                                   | CA,<br>KH <sub>2</sub> PO <sub>4</sub> ,<br>EDA               | Microwav<br>e<br>irradiation | 700 W          | 9 min              | SBR                     | Two-roll<br>mill                  | 20 phr      | [21] |
| <b>Membranes</b>                     |                                                               |                              |                |                    |                         |                                   |             |      |
| 22                                   | CA,<br>diethylenet<br>riamine,<br>water                       | Microwav<br>e<br>irradiation | 750 W          | 5 min              | Poly(ether<br>-b-amide) | Mixing                            | 1 wt%       | [22] |
| 23                                   | CA,<br>diethylenet<br>riamine                                 | Microwav<br>e<br>irradiation | Comm<br>ercial | Com<br>merci<br>al | Nafion                  | Mixing                            | 5%          | [23] |
| 24                                   | Glucose,<br>KH <sub>2</sub> PO <sub>4</sub>                   | Hydrother<br>mal             | 200 °C         | 12 h               | PSF                     | Interfacial<br>polymerizati<br>on | 0.02<br>wt% | [24] |

|                           |                                                                                   |                            |                |            |                       |                                   |           |      |
|---------------------------|-----------------------------------------------------------------------------------|----------------------------|----------------|------------|-----------------------|-----------------------------------|-----------|------|
| 25                        | Rice husk, EDA, ascorbic acid                                                     | Hydrothermal               | 190 °C         | 12 h       | PSF                   | Mixing                            | 0.05%     | [25] |
| 26                        | Glucose, PEG                                                                      | Hydrothermal               | 180 °C         | 20 h       | PES                   | Mixing                            | 1 wt%     | [26] |
| 27                        | EDA, CA                                                                           | Hydrothermal               | 150 °C         | 5 h        | PVA                   | Mixing                            | 0.2%      | [27] |
| 28                        | Commercial                                                                        | Hydrothermal               | Commercial     | Commercial | PAN/Poly caprolactone | Mixing                            | 4 wt.%    | [28] |
| <b>Textile fibers</b>     |                                                                                   |                            |                |            |                       |                                   |           |      |
| 29                        | CS, acetic acid                                                                   | Hydrothermal               | 180 °C         | 8 h        | PP                    | Melt spinning process             | 0.5 wt.%  | [29] |
| 30                        | Polyoxyethylene-polyoxypropylene-polyoxyethylene, phosphoric acid, water, toluene | Heated on magnetic stirrer | 250 °C         | 2 h        | PCL                   | Mixing                            | 0.22 wt.% | [30] |
| 31                        | CA, EDA, borax                                                                    | Hydrothermal               | 180 °C         | 5 h        | Cotton fabric, EPTC   | Grafting                          | -NA-      | [31] |
| 32                        | CA, thiourea, folic acid                                                          | Hydrothermal               | 200 °C         | 6 h        | PEO                   | Mixing                            | 4 wt%     | [32] |
| <b>Functional aspects</b> |                                                                                   |                            |                |            |                       |                                   |           |      |
| 33                        | CA, dodecylamine (DDA)                                                            | Pyrolysis                  | 200 °C         | 2.5 h      | PS                    | Pickering emulsion polymerization | 2 wt%     | [33] |
| 34                        | CA                                                                                | Carbonization              | 200 °C         | 15 min     | PU                    | One-pot polymerization            | 3 wt%     | [34] |
| 35                        | CA, sodium citrate                                                                | Electrochemical method     | 190 mA current | 24 h       | Carbopol              | Mixing                            | 1 wt%     | [35] |
| 36                        | CS, acetic acid, water                                                            | Pyrolysis method           | 130° C         | 10 to 15 h | PVA/PEG               | Mixing                            | 0.8 wt%   | [36] |

|    |                  |                            |           |       |       |        |       |      |
|----|------------------|----------------------------|-----------|-------|-------|--------|-------|------|
| 37 | Starch,<br>water | Microwav<br>e<br>radiation | 1000<br>W | 5 min | COEp  | Mixing | 3 wt% | [37] |
| 38 | Starch,<br>water | Microwav<br>e<br>radiation | 1000<br>W | 5 min | EP/PU | Mixing | 3 wt% | [38] |

Table S2. Comparison of pure polymers and CQDs-reinforced polymers.

| <b>Sr.</b> | <b>Pure Polymers</b>                                     | <b>CQDs-reinforced polymers</b>                                                            | <b>Ref.</b> |
|------------|----------------------------------------------------------|--------------------------------------------------------------------------------------------|-------------|
| 1          | PVA<br>Regain only 20% after<br>270S                     | PVA/CQDs<br>Completely regain after 180S                                                   | [1]         |
| 2          | PVA<br>Not recover the original<br>shape after 180S      | PVA/CQDs<br>Completely regain after 180S                                                   | [3]         |
| 3          | PVA/agarose/CS/glycerin<br>Not healed after breaking     | PVA/agarose/CS/glycerin/CQDs<br>Healed and more than ten times<br>extendable after healing | [4]         |
| 4          | ODA<br>Not healed, fast bacterial<br>growth              | PL-CD@ODA<br>Completely healed, antibacterial                                              | [5]         |
| 5          | Agar/pAM<br>Tensile strength 0.18<br>MPa and strain 420% | Agar/pAM/CQDs<br>Tensile strength 1.68 MPa and<br>strain 1400%                             | [7]         |

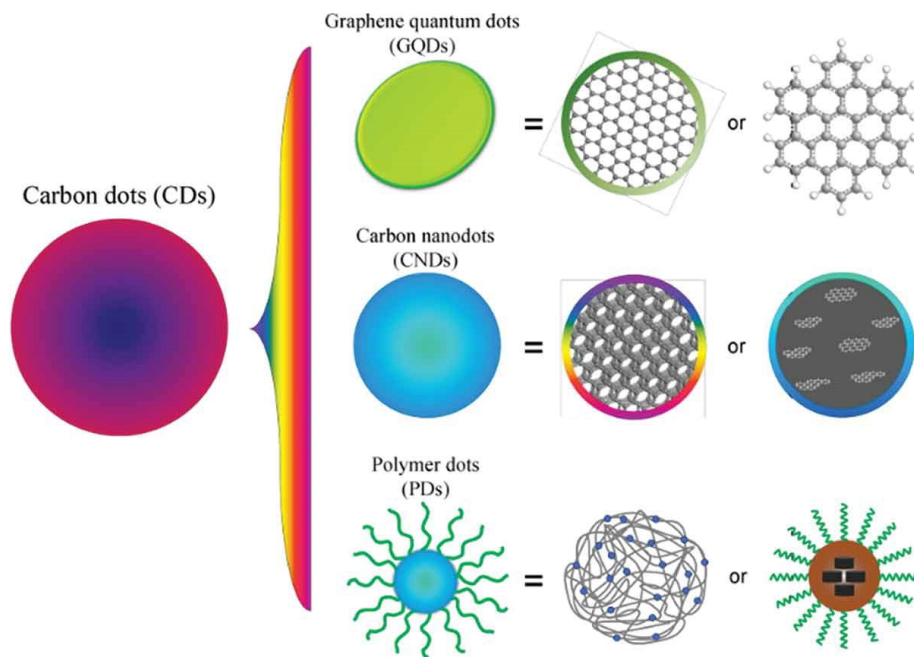

Figure S1. Detailed structures of different QDs including GQD, CQDs, and PQDs [39].

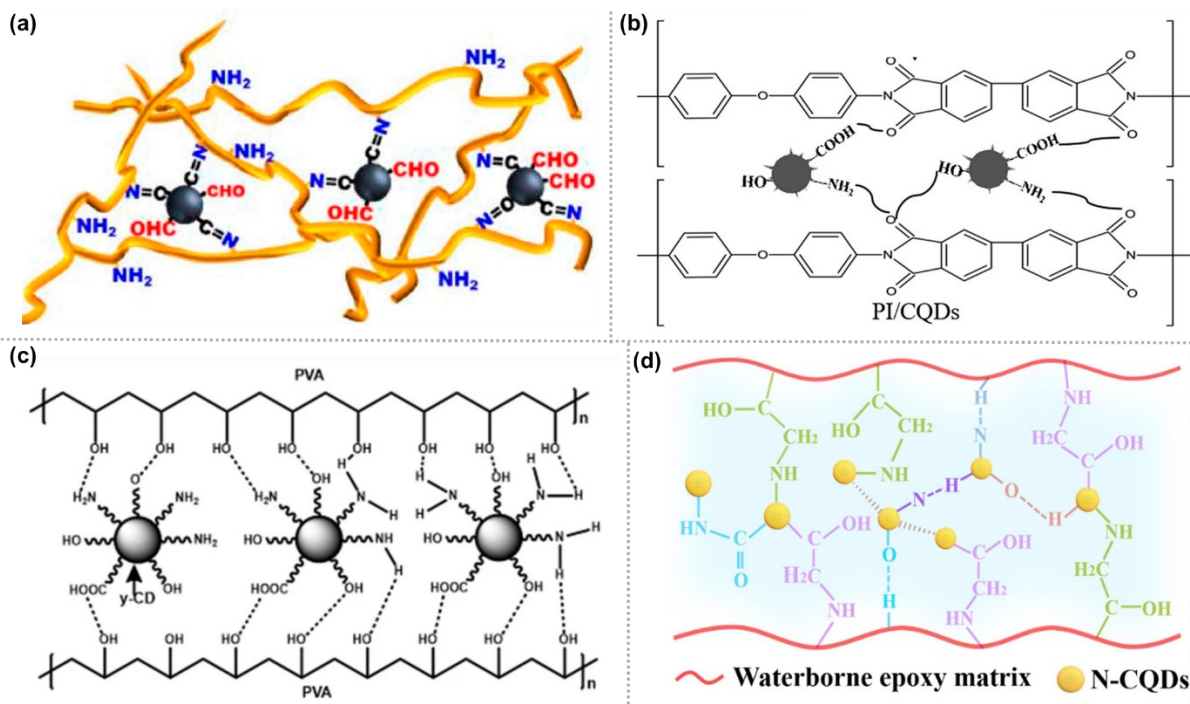

Figure S2. Shows the different interactions of polymer with CQDs (a) PEI/CQDs [40], (b) PI/CQDs [41], (c) PVA/CQDs [42], and (d) epoxy/CQDs [43].

## References

- [1] G. Yang *et al.*, "Luminescent Poly(vinyl alcohol)/Carbon Quantum Dots Composites with Tunable Water-Induced Shape Memory Behavior in Different pH and Temperature Environments," *ACS Appl Mater Interfaces*, vol. 8, no. 50, pp. 34744–34754, Dec. 2016, doi: 10.1021/ACSAMI.6B11476/SUPPL\_FILE/AM6B11476\_SI\_007.AVI.
- [2] W. Wang *et al.*, "Water-induced poly(vinyl alcohol)/carbon quantum dot nanocomposites with tunable shape recovery performance and fluorescence," *J Mater Chem B*, vol. 6, no. 45, pp. 7444–7450, Nov. 2018, doi: 10.1039/C8TB02064G.
- [3] S. Wu *et al.*, "Large-Scale One-Step Synthesis of Carbon Dots from Yeast Extract Powder and Construction of Carbon Dots/PVA Fluorescent Shape Memory Material," *Adv Opt Mater*, vol. 6, no. 7, p. 1701150, Apr. 2018, doi: 10.1002/ADOM.201701150.
- [4] M. Li *et al.*, "A self-healing hydrogel with pressure sensitive photoluminescence for remote force measurement and healing assessment," *Mater Horiz*, vol. 6, no. 4, pp. 703–710, Apr. 2019, doi: 10.1039/C8MH01441H.



- [5] X. Yang *et al.*, "A facile injectable carbon dot/oxidative polysaccharide hydrogel with potent self-healing and high antibacterial activity," *Carbohydr Polym*, vol. 251, p. 117040, Jan. 2021, doi: 10.1016/J.CARBPOL.2020.117040.
- [6] S. Bhattacharya *et al.*, "Fluorescent Self-Healing Carbon Dot/Polymer Gels," *ACS Nano*, vol. 13, no. 2, pp. 1433–1442, Feb. 2019, doi: 10.1021/ACS.NANO.8B07087/SUPPL\_FILE/NN8B07087\_SI\_001.PDF.
- [7] S. Xie *et al.*, "Agar/carbon dot crosslinked polyacrylamide double-network hydrogels with robustness, self-healing, and stimulus-response fluorescence for smart anti-counterfeiting," *Mater Chem Front*, vol. 5, no. 14, pp. 5418–5428, Jul. 2021, doi: 10.1039/D1QM00338K.
- [8] P. Huang *et al.*, "Carbon quantum dots inducing formation of  $\beta$  phase in PVDF-HFP to improve the piezoelectric performance," *Sens Actuators A Phys*, vol. 330, p. 112880, Oct. 2021, doi: 10.1016/J.SNA.2021.112880.
- [9] Y. Xu *et al.*, "Glowing stereocomplex biopolymers are generating power: polylactide/carbon quantum dot hybrid nanofibers with high piezoresponse and multicolor luminescence," *J Mater Chem A Mater*, vol. 7, no. 4, pp. 1810–1823, Jan. 2019, doi: 10.1039/C8TA08593E.
- [10] S. Ma *et al.*, "Nanogenerators Begin to Light Up: A Novel Poling-Free Piezoelectric System with Multicolor Photoluminescence as an Efficient Mechatronics Development Platform," *Adv Mater Interfaces*, vol. 5, no. 19, p. 1800587, Oct. 2018, doi: 10.1002/ADMI.201800587.
- [11] X. Tao, M. Liao, F. Wu, Y. Jiang, J. Sun, and S. Shi, "Designing of biomass-derived carbon quantum dots@polyvinyl alcohol film with excellent fluorescent performance and pH-responsiveness for intelligent detection," *Chemical Engineering Journal*, vol. 443, p. 136442, Sep. 2022, doi: 10.1016/J.CEJ.2022.136442.
- [12] B. De, B. Voit, and N. Karak, "Transparent luminescent hyperbranched epoxy/carbon oxide dot nanocomposites with outstanding toughness and ductility," *ACS Appl Mater Interfaces*, vol. 5, no. 20, pp. 10027–10034, Oct. 2013, doi: 10.1021/AM402415G/SUPPL\_FILE/AM402415G\_SI\_001.PDF.
- [13] B. De, B. Voit, and N. Karak, "Carbon dot reduced Cu<sub>2</sub>O nanohybrid/hyperbranched epoxy nanocomposite: mechanical, thermal and photocatalytic activity," *RSC Adv*, vol. 4, no. 102, pp. 58453–58459, Nov. 2014, doi: 10.1039/C4RA11120F.
- [14] A. K. Chaturvedi, A. Pappu, and M. K. Gupta, "Unraveling the role of agro waste-derived graphene quantum dots on dielectric and mechanical property of the fly ash based polymer nanocomposite," *J Alloys Compd*, vol. 903, p. 163953, May 2022, doi: 10.1016/J.JALLCOM.2022.163953.
- [15] J. Bai *et al.*, "High-performance thermoplastic polyurethane elastomer/carbon dots bulk nanocomposites with strong luminescence:," <https://doi.org/10.1177/0954008320907123>, vol. 32, no. 7, pp. 857–867, Feb. 2020, doi: 10.1177/0954008320907123.
- [16] B. Ghosh, S. Gogoi, S. Thakur, and N. Karak, "Bio-based waterborne polyurethane/carbon dot nanocomposite as a surface coating material," *Prog Org Coat*, vol. 90, pp. 324–330, Jan. 2016, doi: 10.1016/J.PORGCOAT.2015.10.025.

- [17] J. Zhu *et al.*, "Engineering cross-linking by coal-based graphene quantum dots toward tough, flexible, and hydrophobic electrospun carbon nanofiber fabrics," *Carbon N Y*, vol. 129, pp. 54–62, Apr. 2018, doi: 10.1016/J.CARBON.2017.11.071.
- [18] L. Wang *et al.*, "Enhancing the thermostability, UV shielding and antimicrobial activity of transparent chitosan film by carbon quantum dots containing N/P," *Carbohydr Polym*, vol. 278, p. 118957, Feb. 2022, doi: 10.1016/J.CARBPOL.2021.118957.
- [19] L. Kong, Y. Zhu, G. Huang, and J. Wu, "Carbon nanodots as dual role of crosslinking and reinforcing chloroprene rubber," *Composites Communications*, vol. 22, p. 100441, Dec. 2020, doi: 10.1016/J.COCO.2020.100441.
- [20] P. R. Sreenath, S. Mandal, H. Panigrahi, P. Das, and K. Dinesh Kumar, "Carbon dots: Fluorescence active, covalently conjugated and strong reinforcing nanofiller for polymer latex," *Nano-Structures & Nano-Objects*, vol. 23, p. 100477, Jul. 2020, doi: 10.1016/J.NANOSO.2020.100477.
- [21] P. Yu, G. Jin, W. Wang, R. Wang, B. Guo, and L. Zhang, "Dispersing carbon dots in non-polar rubber by slurry compounding and in situ compatibilizing," *Composites Communications*, vol. 22, p. 100429, Dec. 2020, doi: 10.1016/J.COCO.2020.100429.
- [22] F. Shi *et al.*, "Carbon quantum dot-enabled tuning of the microphase structures of poly(ether-b-amide) membrane for CO<sub>2</sub> separation," *Ind Eng Chem Res*, vol. 59, no. 33, pp. 14960–14969, Aug. 2020, doi: 10.1021/ACS.IECR.0C03432/SUPPL\_FILE/IEOC03432\_SI\_001.PDF.
- [23] W. Wu *et al.*, "Molecular-Level Hybridization of Nafion with Quantum Dots for Highly Enhanced Proton Conduction," *Advanced Materials*, vol. 30, no. 16, p. 1707516, Apr. 2018, doi: 10.1002/ADMA.201707516.
- [24] Y. Li, S. Li, and K. Zhang, "Influence of hydrophilic carbon dots on polyamide thin film nanocomposite reverse osmosis membranes," *J Memb Sci*, vol. 537, pp. 42–53, Sep. 2017, doi: 10.1016/J.MEMSCI.2017.05.026.
- [25] N. H. Zainal Abidin, S. N. A. Shafie, H. Suhaimi, N. S. Sambudi, and N. A. H. Sapiaa Md Nordin, "Incorporation of carboxyl and amino functionalized carbon quantum dots in thin film membrane for nanofiltration," *Polym Test*, vol. 100, p. 107270, Aug. 2021, doi: 10.1016/J.POLYMERTESTING.2021.107270.
- [26] C. Zhang, K. Wei, W. Zhang, Y. Bai, Y. Sun, and J. Gu, "Graphene Oxide Quantum Dots Incorporated into a Thin Film Nanocomposite Membrane with High Flux and Antifouling Properties for Low-Pressure Nanofiltration," *ACS Appl Mater Interfaces*, vol. 9, no. 12, pp. 11082–11094, Mar. 2017, doi: 10.1021/ACSAMI.6B12826/SUPPL\_FILE/AM6B12826\_SI\_001.PDF.
- [27] Y. Z. Wu *et al.*, "Carbon quantum dots doped thin-film nanocomposite (TFN) membrane on macroporous ceramic hollow fiber support via one-step interfacial polymerization," *Sep Purif Technol*, vol. 266, p. 118572, Jul. 2021, doi: 10.1016/J.SEPPUR.2021.118572.
- [28] C. M. P. Maborang, J. N. B. Padrigo, G. M. Quiachon, and P. A. N. de Yro, "Synthesis and Characterization of Electrospun Carbon Quantum Dots – Polyacrylonitrile/Polycaprolactone Composite Nanofiber Membranes for Copper (II) Adsorption," *Key Eng Mater*, vol. 878, pp. 3–8, 2021, doi: 10.4028/WWW.SCIENTIFIC.NET/KEM.878.3.

- [29] B. Safaie, M. Youssefi, and B. Rezaei, "The structure and fluorescence properties of polypropylene/carbon quantum dot composite fibers," *Polymer Bulletin*, vol. 79, no. 3, pp. 1367–1389, Mar. 2022, doi: 10.1007/S00289-021-03572-6/FIGURES/19.
- [30] K. Ghosal, M. Kováčová, P. Humpolíček, J. Vajdák, M. Bodík, and Z. Špitalský, "Antibacterial photodynamic activity of hydrophobic carbon quantum dots and polycaprolactone based nanocomposite processed via both electrospinning and solvent casting method," *Photodiagnosis Photodyn Ther*, vol. 35, p. 102455, Sep. 2021, doi: 10.1016/J.PDPDT.2021.102455.
- [31] Q. I. Shuai, L. Xu, S. Sun, H. Zhang, and D. Zuo, "GRAFTING OF BORON-NITROGEN-DOPED CARBON QUANTUM DOTS ON COTTON FABRIC FOR IMPARTING ANTI-ULTRAVIOLET PROPERTIES," *CELLULOSE CHEMISTRY AND TECHNOLOGY Cellulose Chem. Technol*, vol. 56, no. 6, pp. 657–665, 2022.
- [32] S. Zirak Hassan Kiadeh, A. Ghaee, F. Pishbin, J. Nourmohammadi, and M. Farokhi, "Nanocomposite pectin fibers incorporating folic acid-decorated carbon quantum dots," *Int J Biol Macromol*, vol. 216, pp. 605–617, Sep. 2022, doi: 10.1016/J.IJBIOMAC.2022.07.031.
- [33] R. Ma, R. Shen, Y. Quan, and Q. Wang, "Tunable flammability studies of graphene quantum dots-based polystyrene nanocomposites using microscale combustion calorimeter," *J Therm Anal Calorim*, vol. 147, no. 19, pp. 10383–10390, Oct. 2022, doi: 10.1007/S10973-022-11277-9/FIGURES/5.
- [34] Z. Rahmatpanah, M. M. Alavi Nikje, and M. Dargahi, "Optical Active Thermal Stable Nanocomposites Using Polybutadiene-Based Polyurethane and Graphene Quantum Dot-MnO<sub>2</sub>," *Int J Polym Sci*, vol. 2022, 2022, doi: 10.1155/2022/2377803.
- [35] V. Saez *et al.*, "Graphene quantum dots nanoparticles changed the rheological properties of hydrophilic gels (carbopol)," *J Mol Liq*, vol. 287, p. 110949, Aug. 2019, doi: 10.1016/J.MOLLIQ.2019.110949.
- [36] F. Hu, H. Lu, G. Xu, L. Lv, L. Chen, and Z. Shao, "Carbon quantum dots improve the mechanical behavior of polyvinyl alcohol/polyethylene glycol hydrogel," *J Appl Polym Sci*, vol. 139, no. 34, p. e52805, Sep. 2022, doi: 10.1002/APP.52805.
- [37] A. Madhi and B. Shirkavand Hadavand, "UV protective bio-based epoxy/carbon quantum dots nanocomposite coatings: Synthesis and investigation of properties," *J Compos Mater*, vol. 56, no. 14, pp. 2201–2210, Jun. 2022, doi: 10.1177/00219983221092009/ASSET/IMAGES/LARGE/10.1177\_00219983221092009-FIG2.JPEG.
- [38] A. Madhi, "Smart epoxy/polyurethane/carbon quantum dots hybrid coatings: Synthesis and study of UV-shielding, viscoelastic, and anti-corrosive properties," *Polymer-Plastics Technology and Materials*, 2022, doi: 10.1080/25740881.2022.2116342.
- [39] P. Koutsogiannis, E. Thomou, H. Stamatis, D. Gournis, and P. Rudolf, "Advances in fluorescent carbon dots for biomedical applications," *Adv Phys X*, vol. 5, no. 1, p. 1758592, Jan. 2020, doi: 10.1080/23746149.2020.1758592.

- [40] M. Zulfajri, S. Sudewi, S. Ismulyati, A. Rasool, M. Adlim, and G. G. Huang, "Carbon Dot/Polymer Composites with Various Precursors and Their Sensing Applications: A Review," *Coatings 2021*, Vol. 11, Page 1100, vol. 11, no. 9, p. 1100, Sep. 2021, doi: 10.3390/COATINGS11091100.
- [41] Y. Zhang *et al.*, "Synthesis and properties of PI composite films using carbon quantum dots as fillers," *E-Polymers*, vol. 22, no. 1, pp. 577–584, Jan. 2022, doi: 10.1515/EPOLY-2022-0054/ASSET/GRAPHIC/J\_EPOLY-2022-0054\_FIG\_007.JPG.
- [42] H. Bhanushali, S. Amrutkar, S. Mestry, and S. T. Mhaske, "Shape memory polymer nanocomposite: a review on structure–property relationship," *Polymer Bulletin 2021 79:6*, vol. 79, no. 6, pp. 3437–3493, May 2021, doi: 10.1007/S00289-021-03686-X.
- [43] X. Wang *et al.*, "A novel waterborne epoxy coating with anti-corrosion performance under harsh oxygen environment," *Chemical Engineering Journal*, vol. 430, p. 133156, Feb. 2022, doi: 10.1016/J.CEJ.2021.133156.
